# Supplementary material for: Stability of the Fungal Pigment from Scytalidium cuboideum Carried in Food-Grade Natural Oils
Source: MDPI journal article supplement (doi:10.3390/jof8030276), 2022-03-09
Supplement: s1 [file s1]

Table S2. Fatty acid composition of tested oils. Sources: <sup>1</sup>(United States Department of Agriculture, 2018), <sup>2</sup>(Busson-Breyse, Farines, & Soulier, 1994). \*The exact composition of MCT oil is unknown as percentages of palm kernel and coconut oils were not listed and can vary. \*\*Mineral oil is a petroleum-based oil.

| <b>Oil</b>                 | <b>% Saturated</b> | <b>% Monounsaturated</b> | <b>% Polyunsaturated</b> |
|----------------------------|--------------------|--------------------------|--------------------------|
| Flax seed <sup>1</sup>     | 9.0                | 18.4                     | 67.8                     |
| Grapeseed <sup>1</sup>     | 11.0               | 16.1                     | 69.9                     |
| Hemp seed <sup>1</sup>     | 7.0                | 9.0                      | 82.0                     |
| Clear jojoba <sup>2</sup>  | 0.9                | 99.1                     | 0.0                      |
| Golden jojoba <sup>2</sup> | 0.9                | 99.1                     | 0.0                      |
| MCT*                       |                    |                          |                          |
| Palm kernel <sup>1</sup>   | 49.3               | 37.0                     | 9.3                      |
| Coconut <sup>1</sup>       | 82.5               | 6.3                      | 1.7                      |
| Mineral**                  | N/A                | N/A                      | N/A                      |
| Olive <sup>1</sup>         | 13.8               | 73.0                     | 10.5                     |
