# Supplementary material for: Stability of the Fungal Pigment from Scytalidium cuboideum Carried in Food-Grade Natural Oils
Source: MDPI journal article supplement (doi:10.3390/jof8030276), 2022-03-09
Supplement: s1 [file s1]

Table S1. Saturation results for draconin red. All replicates for golden jojoba oil and mineral oil fell out of solution with the exact same amount of pigment.

| <b>Oil</b>        | <b>Mean Saturation<br/>Amount of Solubilized<br/>Pigment (mL)</b> | <b>Standard Error</b> | <b>Minimum Amount of Solubilized<br/>Pigment Needed to Saturate 100<br/>mL of Oil (mL)</b> |
|-------------------|-------------------------------------------------------------------|-----------------------|--------------------------------------------------------------------------------------------|
| Flax seed oil     | 32.20                                                             | 0.97                  | 1561.52                                                                                    |
| Grapeseed oil     | 28.70                                                             | 3.25                  | 1272.67                                                                                    |
| Hemp seed oil     | 33.45                                                             | 0.57                  | 1643.87                                                                                    |
| Clear jojoba oil  | 21.60                                                             | 1.17                  | 1021.70                                                                                    |
| Golden jojoba oil | 15.75                                                             | 0.00                  | 787.50                                                                                     |
| MCT oil           | 28.50                                                             | 2.26                  | 1312.64                                                                                    |
| Mineral oil       | 4.00                                                              | 0.00                  | 200.00                                                                                     |
| Olive oil         | 25.55                                                             | 0.53                  | 1250.87                                                                                    |
